# Supplementary material for: Crystallization control of Cu(i)-halide via thermal evaporation for improving resistive switching memory performance
Source: Royal Society of Chemistry journal article supplement (doi:10.1039/d4nr04200j), 2024-12-20
Supplement: d4nr04200j1.pdf [file d4nr04200j1.pdf]

## Supplementary Information

### Crystallization Control of Cu(I)-Halide via Thermal Evaporation for Improving Resistive Switching Memory Performance

SangMyeong Lee,<sup>‡a</sup> Bong Ki Hong,<sup>‡a</sup> Sang-Uk Lee,<sup>b</sup> Jong-In Huh,<sup>a</sup> Geon Woo Yoon,<sup>a</sup> Nam-Gyu Park<sup>b,c</sup> and Hyun Suk Jung<sup>\*a,c</sup>

<sup>a</sup> School of Advanced Materials Science & Engineering, Sungkyunkwan University, Suwon 16419, Republic of Korea

<sup>b</sup> School of Chemical Engineering, Center for Antibonding Regulated Crystals, Sungkyunkwan University, Suwon 16419, Republic of Korea

<sup>c</sup> SKKU Institute of Energy Science and Technology (SIEST), Sungkyunkwan University, Suwon 16419, Republic of Korea

#### Corresponding Authors

\*H. S. Jung E-mail: [hsjung1@skku.edu](mailto:hsjung1@skku.edu)

**KEYWORDS:** halide materials, physical vapor deposition, crystallization, trap density, resistive switching

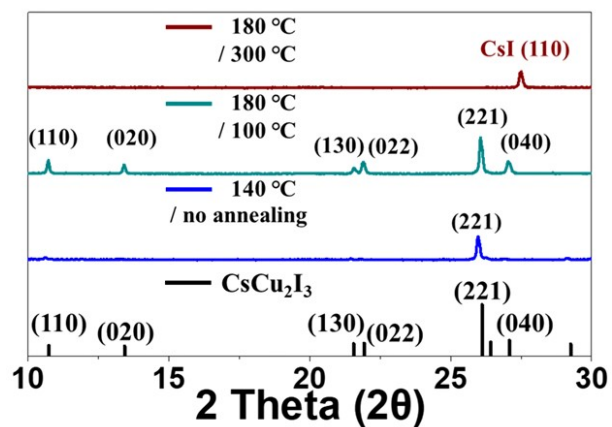

**Fig. S1** XRD patterns of CsCu<sub>2</sub>I<sub>3</sub> thin film as a function of deposited substrate temperature (Black line – CsCu<sub>2</sub>I<sub>3</sub> PDF#77-0069, blue line - deposited at 140 °C and no annealing, cyan line - deposited at 180 °C then annealed at 100 °C, and wine line - deposited at 180 °C then annealed at 300 °C).

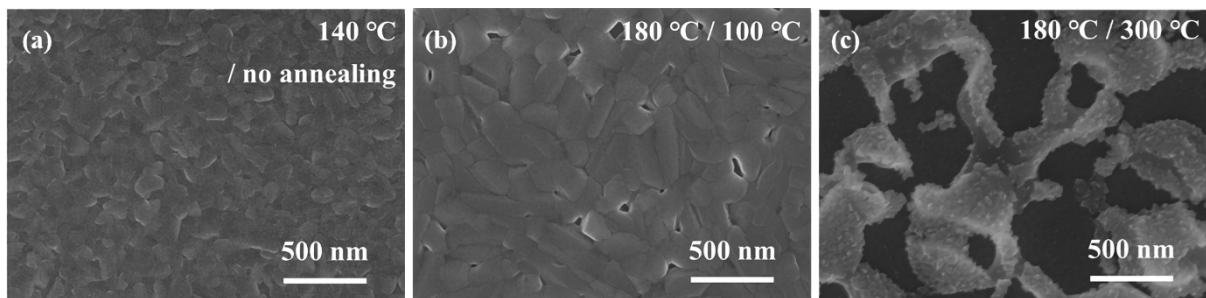

**Fig. S2** (a-c) Plane SEM images of CsCu<sub>2</sub>I<sub>3</sub> thin film as a function of substrate temperature during deposition process and post-annealing temperature. (a) deposited at 140 °C and no annealing, (b) deposited at 180 °C then annealed at 100 °C, and (c) deposited at 180 °C then annealed at 300 °C.

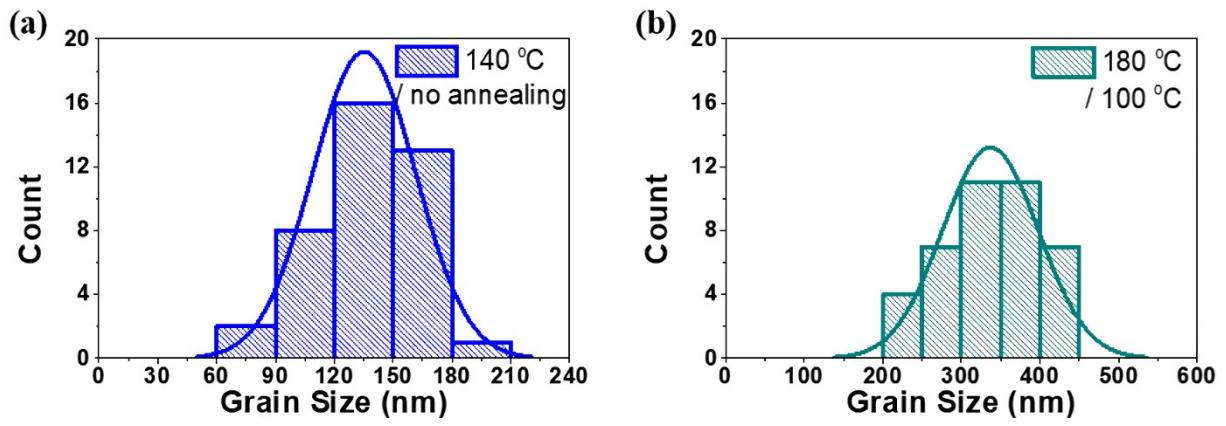

**Fig. S3** (a,b) Histogram graph of grain size of CsCu<sub>2</sub>I<sub>3</sub> thin films a function of substrate temperature during deposition process and post-annealing temperature. (a) deposited at 140 °C and no annealing, and (b) deposited at 180 °C then annealed at 100 °C.

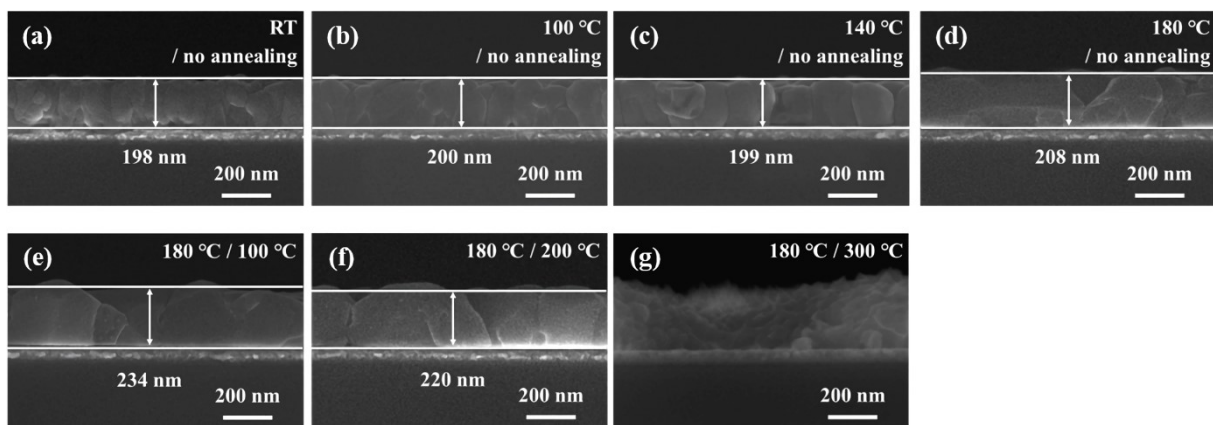

**Fig. S4** (a-g) Cross-sectional SEM images of CsCu<sub>2</sub>I<sub>3</sub> thin film as a function of substrate temperature during deposition process and post-annealing temperature. (a) Deposited at RT and no annealing, (b) deposited at 100 °C and no annealing, (c) deposited at 140 °C and no annealing, (d) deposited at 180 °C and no annealing, (e) deposited at 180 °C then annealed at 100 °C, (f) deposited at 180 °C then annealed at 200 °C, and (g) deposited at 180 °C then annealed at 300 °C.

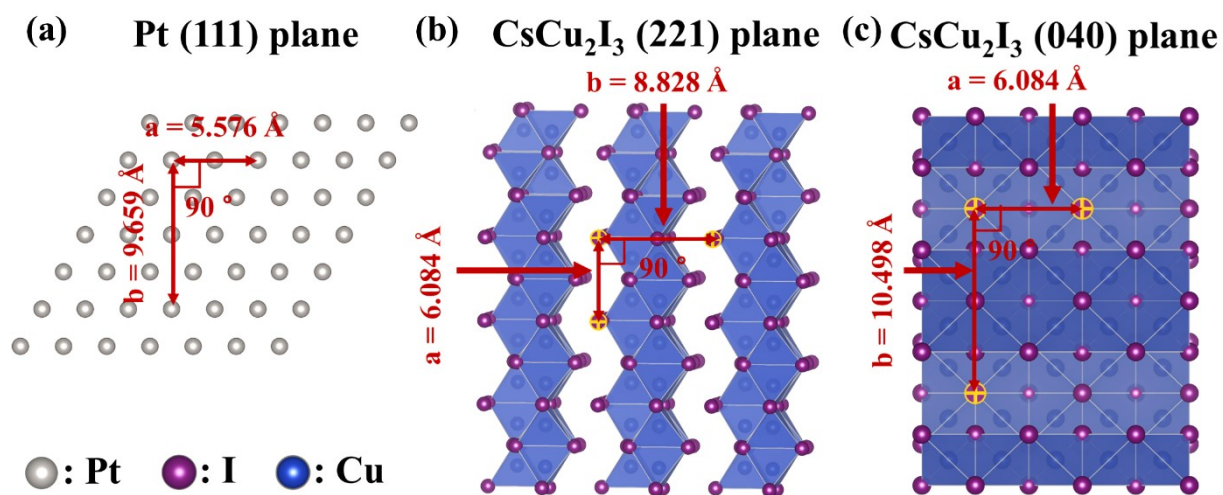

**Fig. S5** (a-c) Schematic two-dimensional lattice illustration on (a) the (111) crystal plane of Pt, (b) the (221) crystal plane of CsCu<sub>2</sub>I<sub>3</sub>, and (c) the (040) crystal plane of CsCu<sub>2</sub>I<sub>3</sub> with Cs<sup>+</sup> hidden for conciseness.

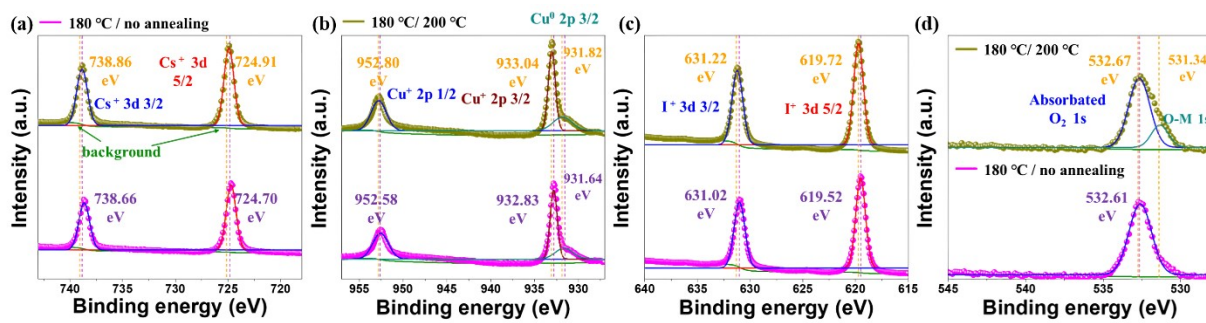

**Fig. S6** High-resolution XPS spectra of (a) Cs 3d, (b) Cu 2p, (c) I 3d, and (d) O 1s for CsCu<sub>2</sub>I<sub>3</sub> thin film under deposited at 180 °C (magenta) and post-heat treated at 200 °C (dark yellow).

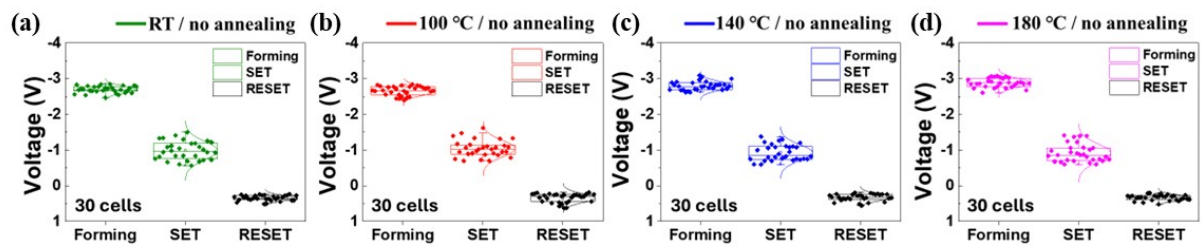

**Fig. S7** (a-d) The average forming, set and reset voltages of of  $\text{CsCu}_2\text{I}_3$  thin film measured across 30 samples as a function of deposited substrate temperature. (a) Deposited at RT and no annealing, (b) deposited at 100 °C and no annealing, (c) deposited at 140 °C and no annealing, and (d) deposited at 180 °C and no annealing.



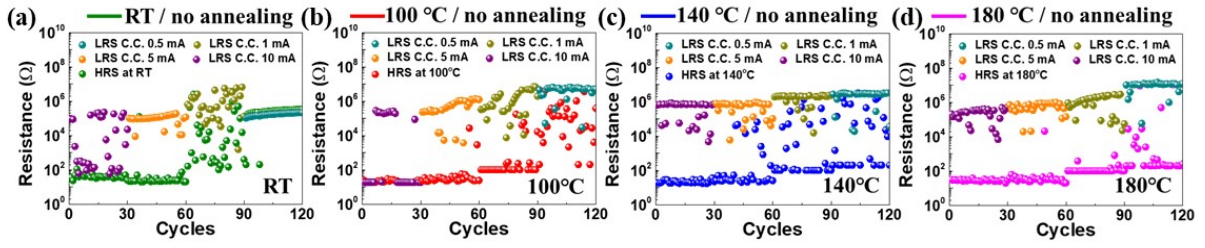

**Fig. S8** (a-d) resistive switching multi-level DC endurance property measured with the DC pulses (set pulse voltage -1 V and duration 640  $\mu$ s, reset pulse voltage 1 V and duration 640  $\mu$ s and read pulse voltage -0.1 V and duration 640  $\mu$ s, purple – 10 mA of C.C., orange – 5 mA, dark yellow – 1 mA, and cyan – 0.5 mA). (a) Deposited at RT and no annealing, (b)- deposited at 100 °C and no annealing, (c) deposited at 140 °C and no annealing, and (d) deposited at 180 °C and no annealing.

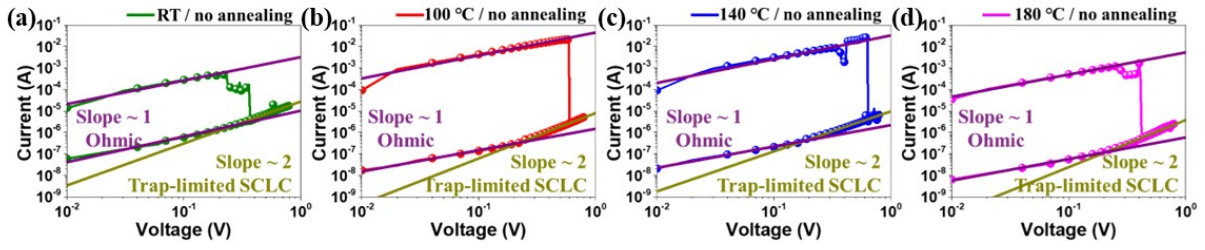

**Fig. S9** (a-d) Logarithmic  $I-V$  characteristics of  $\text{CsCu}_2\text{I}_3$ -based RS devices as a function of deposited temperature for conduction mechanism at reset process (Purple line is the ohmic region with slope 1, and dark yellow line is the trap-limited SCLC region with slope 2). (a) Deposited at RT and no annealing, (b) deposited at 100 °C and no annealing, (c) deposited at 140 °C and no annealing, and (d) deposited at 180 °C and no annealing.
